# Supplementary material for: Resistin Induces LIN28A-Mediated Let-7a Repression in Breast Cancer Cells Leading to IL-6 and STAT3 Upregulation
Source: MDPI journal article supplement (doi:10.3390/cancers13184498), 2021-09-07
Supplement: s1 [file s1]

# Supplementary Materials: Resistin Induces LIN28A-Mediated Let-7a Repression in Breast Cancer Cells Leading to IL-6 and STAT3 Upregulation

Sachin Kumar Deshmukh, Sanjeev Kumar Srivastava, Haseeb Zubair, Mohammad Aslam Khan, Ajay Pratap Singh and Seema Singh

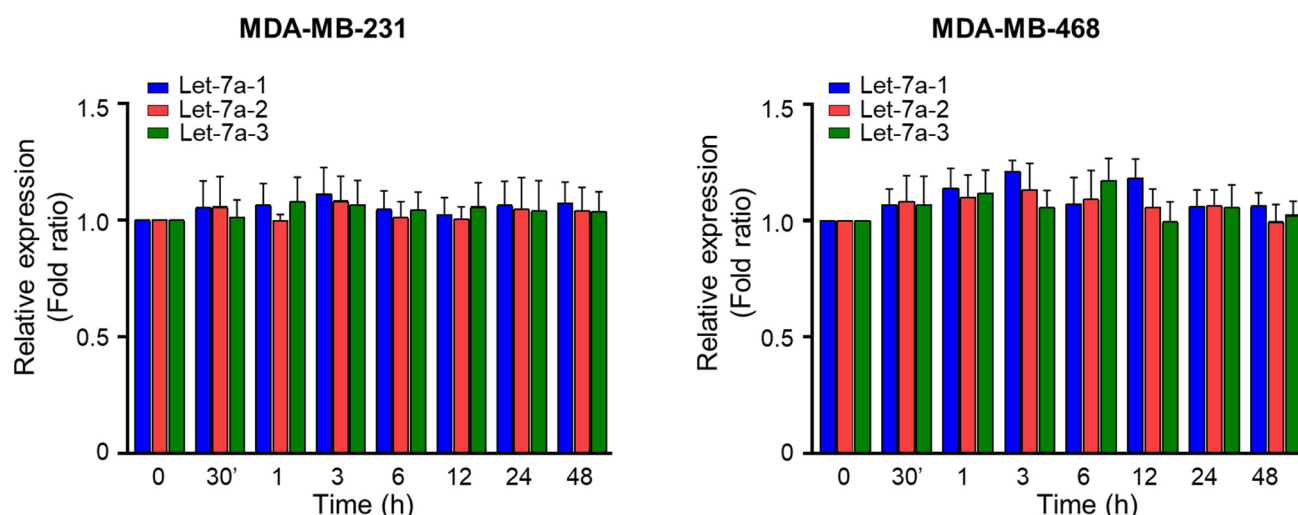

**Figure S1.** Effect of resistin on Let-7a pri-miRNA transcripts expression. MDA-MB-231 and MDA-MB-468 BC cells were grown in a 6-well plates were treated with resistin (0–20 ng/mL) for different time intervals (0–48 h). RNA was isolated and the expression of pri-miRNA transcripts of Let-7a family members Let-7a-1, Let-7a-2, and Let-7a-3 were analyzed by RT-PCR. RNU48 was used as an internal control. Bars represent the mean  $\pm$  SD;  $n = 3$ .

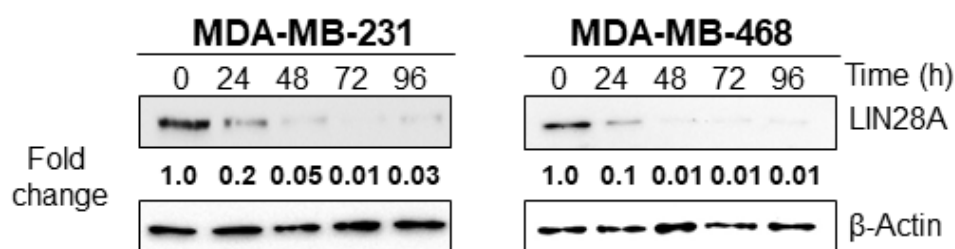

**Figure S2.** Silencing of LIN28A in breast cancer cells. MDA-MB-231 and MDA-MB-468 BC cells were transfected with LIN28A-specific siRNA and total protein was extracted at different time intervals (0–96 h). Immunoblot assay was performed to measure changes in LIN28A expression levels.  $\beta$ -actin was used as an internal control.

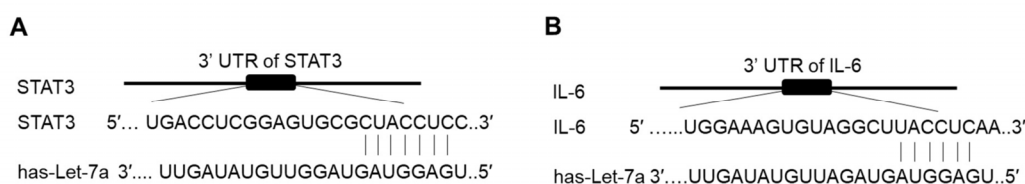

**Figure S3.** In silico analysis (using algorithms of TargetScan) showing Let-7a-binding sites in STAT3 (A) and IL-6 (B) 3'UTR.

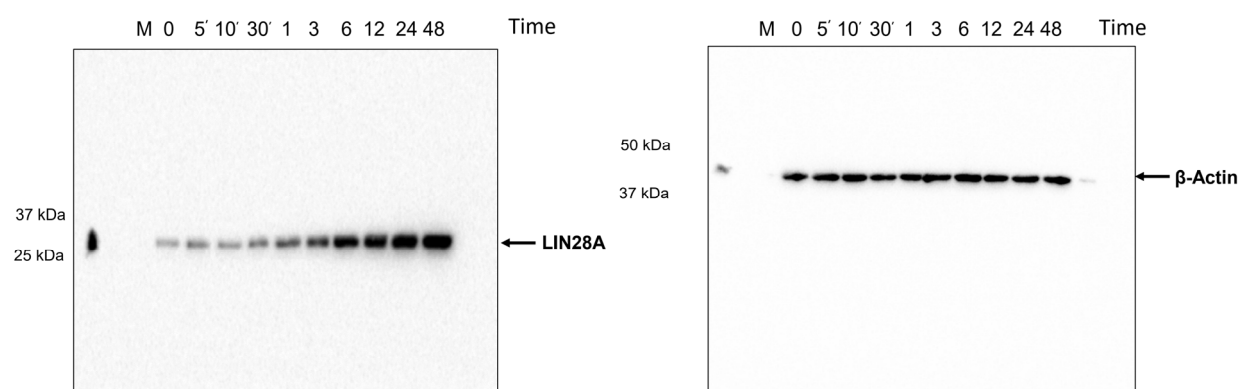

**Figure S4.** Resistin-induced Let-7a downregulation is mediated through LIN28A in breast cancer cells. MDAMB-231 breast cancer cells were grown in a 6-wells plate and treated with 20 ng/mL resistin for indicated time intervals, and the expression of LIN28A was examined at the protein level by immunoblot assay. β-actin were used as internal control.

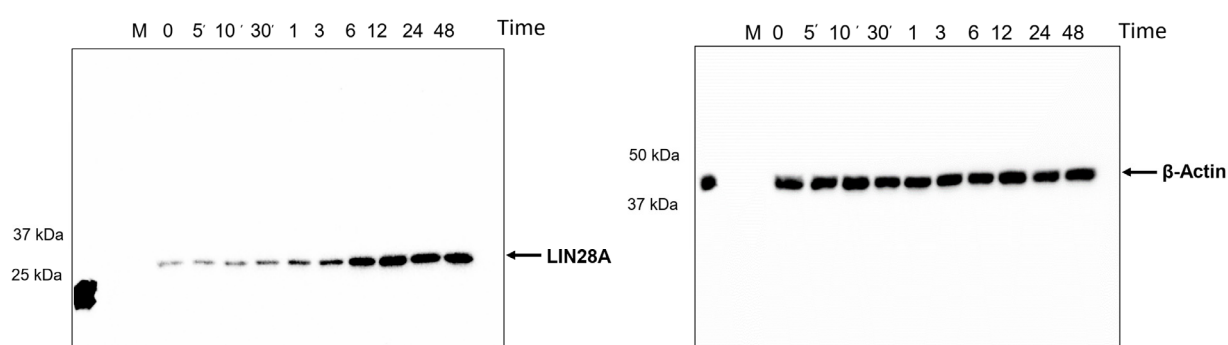

**Figure S5.** Resistin-induced Let-7a downregulation is mediated through LIN28A in breast cancer cells. MDAMB-468 breast cancer cells were grown in a 6-wells plate and treated with 20 ng/mL resistin for indicated time intervals, and the expression of LIN28A was examined at the protein level by immunoblot assay. β-actin were used as internal control.

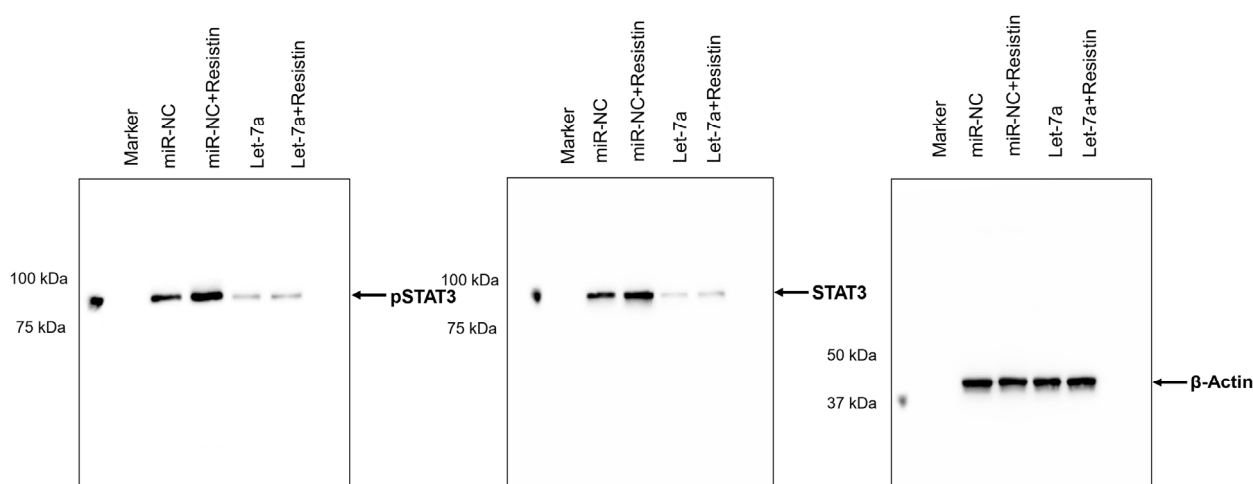

**Figure S6.** STAT3 activation is associated with resistin-induced, Let-7a-mediated effects on gene expression. MDA-MB-231 breast cancer cells were transfected with Let-7a mimic for 24 h, treated with resistin, and the expression of pSTAT3 and STAT3 was analyzed by western blot. β-actin was used as an internal control.

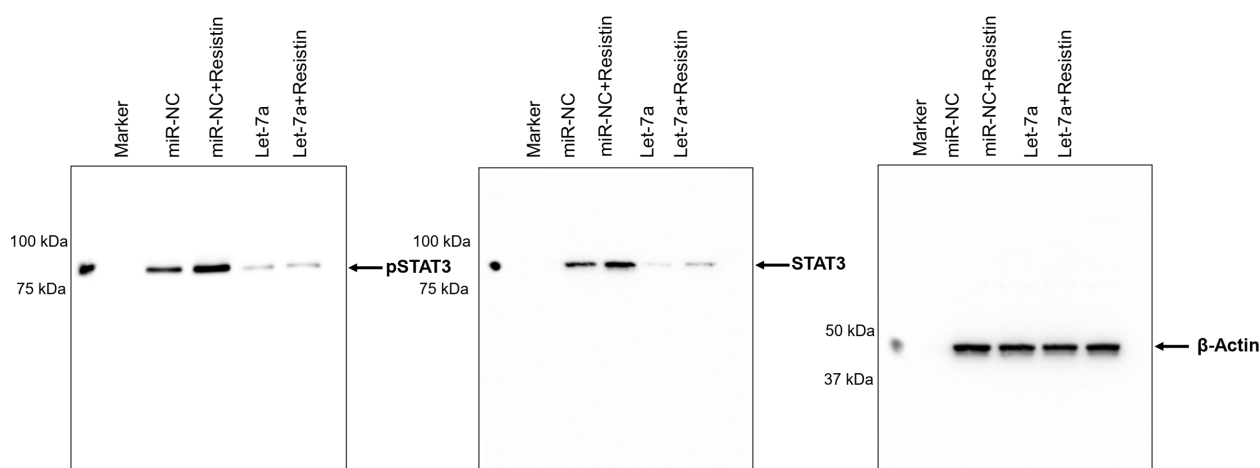

**Figure S7.** STAT3 activation is associated with resistin-induced, Let-7a-mediated effects on gene expression. MDA-MB-468 breast cancer cells were transfected with Let-7a mimic for 24 h, treated with resistin, and the expression of pSTAT3 and STAT3 was analyzed by western blot.  $\beta$ -actin was used as an internal control.

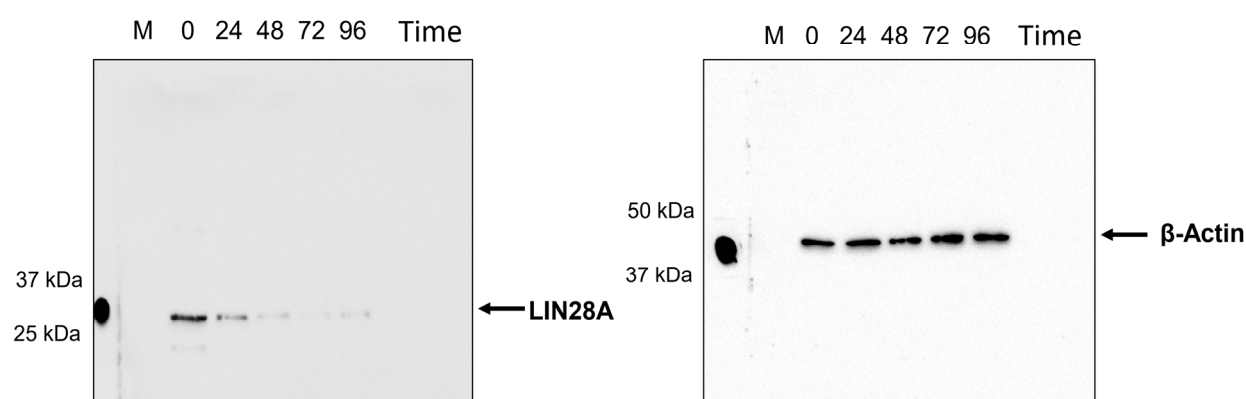

**Figure S8.** Silencing of LIN28A in MDA-MB-231 breast cancer cells. MDA-MB-231 breast cancer cells were transfected with LIN28A-specific siRNA and total protein was extracted at different time intervals (0–96 h). Immunoblot assay was performed to measure changes in LIN28A expression levels.  $\beta$ -actin was used as an internal control.

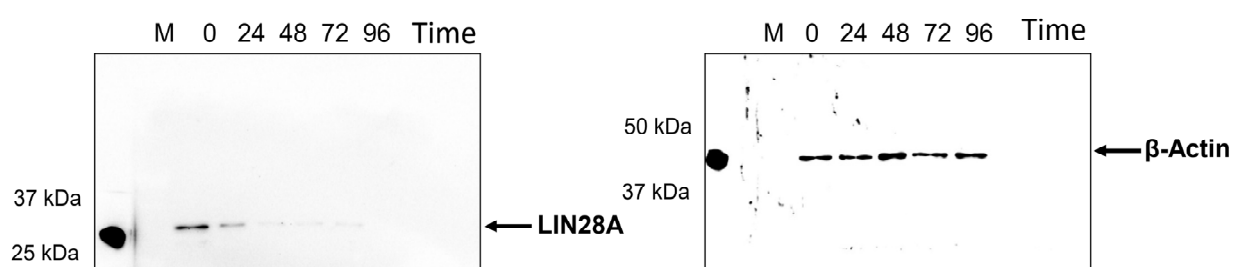

**Figure S9.** Silencing of LIN28A in MDA-MB-468 breast cancer cells. MDA-MB-468 breast cancer cells were transfected with LIN28A-specific siRNA and total protein was extracted at different time intervals (0–96 h). Immunoblot assay was performed to measure changes in LIN28A expression levels.  $\beta$ -actin was used as an internal control.

**Table S1.** List of primers used in this study.

| S. No. | Primer | Sequence (5'-3')                                                                           |
|--------|--------|--------------------------------------------------------------------------------------------|
| 1      | Let-7a | RT: GTCGTATCCAGTGCAGGGTCCGAGGTATTTCGACTGGATACGACAACATAT<br>Forward: TCGGCGTGAGGTAGTAGGTTGT |
| 2      | Let-7b | RT: GTCGTATCCAGTGCAGGGTCCGAGGTATTTCGACTGGATACGACAACCAC<br>Forward: TCGGCGTGAGGTAGTAGGTTGT  |
| 3      | Let-7c | RT: GTCGTATCCAGTGCAGGGTCCGAGGTATTTCGACTGGATACGACAACCAT                                     |

|    |                         |                                                                                                                                                      |
|----|-------------------------|------------------------------------------------------------------------------------------------------------------------------------------------------|
|    |                         | Forward: TCGGCGTGAGGTAGTAGGTTGT                                                                                                                      |
| 4  | Let-7d                  | RT: GTCGTATCCAGTGCAGGGTCCGAGGTATTTCGCACTGGATACGACAACATAT<br>Forward: TCGGCGAGAGGTAGTAGGTTGC                                                          |
| 5  | Let-7e                  | RT: GTCGTATCCAGTGCAGGGTCCGAGGTATTTCGCACTGGATACGACAACATAT<br>Forward: TCGGCGTGAGGTAGGAGGTTGT                                                          |
| 6  | Let-7f                  | RT: GTCGTATCCAGTGCAGGGTCCGAGGTATTTCGCACTGGATACGACAACATAT<br>Forward: TCGGCGTGAGGTAGTAGATTGT                                                          |
| 7  | Let-7g                  | RT: GTCGTATCCAGTGCAGGGTCCGAGGTATTTCGCACTGGATACGACAACATGT<br>Forward: TCGGCGTGAGGTAGTAGTTTGT                                                          |
| 8  | Let-7i                  | RT: GTCGTATCCAGTGCAGGGTCCGAGGTATTTCGCACTGGATACGACAACAGC<br>Forward: TCGGCGTGAGGTAGTAGTTTGT                                                           |
| 9  | miR-98                  | RT: GTCGTATCCAGTGCAGGGTCCGAGGTATTTCGCACTGGATACGACAACAAT<br>Forward: TCGGCGTGAGGTAGTAAGTTGT                                                           |
| 10 | miR-17                  | RT: GTCGTATCCAGTGCAGGGTCCGAGGTATTTCGCACTGGATACGACCTACCT<br>Forward: TCGGCGCAAAGTGCTTACAGTGC                                                          |
| 11 | Universal               | Reverse: GTCGTATCCAGTGCAGGGTCCGAGGT<br>RT: AAAATATGGAACGCTTCACGAATTTG                                                                                |
| 12 | U6                      | Forward: CTCGCTTCGGCAGCACATATACT<br>Reverse: ACGCTTCACGAATTTGCGTGTC                                                                                  |
| 13 | KLF4                    | Forward: GAAATTCGCCCCTCCGATGA<br>Reverse: CTGTGTGTTTGGGTAGTGCC                                                                                       |
| 14 | SOX2                    | Forward: GCCGAGTGGAACCTTTGTGCG<br>Reverse: GGCAGCGTGTACTTATCCTTCT                                                                                    |
| 15 | POU5F1                  | Forward: CTTGAATCCCGAATGGAAAGGG<br>Reverse: GTGTATATCCAGGGTGATCCTC                                                                                   |
| 16 | NANOG                   | Forward: TTTGTGGGCCTGAAGAAAACCT<br>Reverse: AGGGCTGTCCTGAATAAGCAG                                                                                    |
| 17 | TWIST1                  | Forward: GCCAGGTACATCGACTTCCTCT<br>Reverse: TCCATCCTCCAGACCGAGAAGG                                                                                   |
| 18 | ZEB1                    | Forward: TTACACCTTTGCATACAGAACCC<br>Reverse: TTTACGATTACACCCAGACTGC                                                                                  |
| 19 | BAX                     | Forward: CCCGAGAGGTCTTTTCCGAG<br>Reverse: CCAGCCCATGATGGTTCTGAT                                                                                      |
| 20 | PARP1                   | Forward: CGGAGTCTTCGGATAAGCTCT<br>Reverse: TTTCCATCAAACATGGGCGAC                                                                                     |
| 21 | CASP7                   | Forward: CGGTCCTCGTTTGTACCGTC<br>Reverse: CGCCCATACCTGTCACTTTATCA                                                                                    |
| 22 | CASP9                   | Forward: CTCAGACCAGAGATTTCGCAAAC<br>Reverse: GCATTTCCTCCTCAAACCTCTCAA                                                                                |
| 23 | BIRC5                   | Forward: AGGACCACCGCATCTCTACAT<br>Reverse: AAGTCTGGCTCGTTCTCAGTG                                                                                     |
| 24 | BCL2L1                  | Forward: GCCACTTACCTGAATGACCACC<br>Reverse: AACCAGCGGTTGAAGCGTTCCT                                                                                   |
| 25 | BCL2                    | Forward: GGTGGGGTCATGTGTGTGG<br>Reverse: CGGTTCAAGTACTCAGTCATCC                                                                                      |
| 26 | CDKN1B                  | Forward: ATCACAAACCCCTAGAGGGCA<br>Reverse: GGGTCTGTAGTAGAACTCGGG                                                                                     |
| 27 | CDKN1A                  | Forward: CGATGGAACCTTCGACTTTGTCA<br>Reverse: GCACAAGGGTACAAGACAGTG                                                                                   |
| 28 | CDK2                    | Forward: CCAGGAGTTACTTCTATGCCTGA<br>Reverse: TTCATCCAGGGGAGGTACAAC                                                                                   |
| 29 | CDK4                    | Forward: ATGGCTACCTCTCGATATGAGC<br>Reverse: CATTGGGGACTCTCACACTCT                                                                                    |
| 30 | CDK6                    | Forward: CCAGATGGCTCTAACCTCAGT<br>Reverse: AACTTCCACGAAAAAGAGGCTT                                                                                    |
| 31 | CCND1                   | Forward: GCTGCGAAGTGGAACCATC<br>Reverse: CCTCCTTCTGCACACATTTGAA                                                                                      |
| 32 | CCND2                   | Forward: ACCTTCCGCACTGCTCCTA<br>Reverse: CCCAGCCAAGAAACGGTCC                                                                                         |
| 33 | GAPDH                   | Forward: ACAACTTTGGTATCGTGGAAGG<br>Reverse: GCCATCACGCCACAGTTTC                                                                                      |
| 34 | STAT3 3'UTR<br>Mutation | Forward: CACATGGGGGAAGCAGCGCACTCCGAGGTCAA<br>Reverse: TTGACCTCGGAGTGCCTGCTTCCCCCATGTG                                                                |
| 35 | IL-6 3'UTR<br>Mutation  | Forward: TAAAAATATGTATAAGTTAGCCATTTATTTTAAGCAAGCCTACACTTTCCAAGAAATGATCTGGC<br>Reverse: GCCAGATCATTCTTGGAAGTGTAGGCTTGCTTAAATAAATGGCTAACTTATACATATTTTA |
